# Supplementary material
Source: PubMed Central journal article supplement (PMC4033635)
Supplement: tx500088e_si_001.pdf [file tx500088e_si_001.pdf]

# SUPPORTING INFORMATION

## Mutagenic Potential of 8-Oxo-7,8-dihydro-2'-deoxyguanosine Bypass Catalyzed by Human Y-family DNA Polymerases

David J. Taggart, Saul W. Fredrickson, Varun V. Gadkari and Zucui Suo

**Table S1.** Primers used for the addition of unique barcodes and Illumina adapter sequences.

|                                                   |                                                                       |
|---------------------------------------------------|-----------------------------------------------------------------------|
| hPol $\eta$ -Control forward <sup>a</sup>         | 5' -ACACTCTTTCCCTACACGACGCTCTTCCGATCT <u>GGATCC</u> GTCCTCAACCAAC-3'  |
| hPol $\eta$ -Damaged forward <sup>a</sup>         | 5' -ACACTCTTTCCCTACACGACGCTCTTCCGATCT <u>TTCCGCGTCC</u> AACCAAC-3'    |
| hPol $\kappa$ -Control forward <sup>a</sup>       | 5' -ACACTCTTTCCCTACACGACGCTCTTCCGATCT <u>CC</u> TACCGTCCAAACCAAC-3'   |
| hPol $\kappa$ -Damaged forward <sup>a</sup>       | 5' -ACACTCTTTCCCTACACGACGCTCTTCCGATCT <u>CGT</u> TCCGTCCTCAACCAAC-3'  |
| hPol $\iota$ -Control forward <sup>a</sup>        | 5' -ACACTCTTTCCCTACACGACGCTCTTCCGATCT <u>AACT</u> CCGTCCTCAACCAAC-3'  |
| hPol $\iota$ -Damaged forward <sup>a</sup>        | 5' -ACACTCTTTCCCTACACGACGCTCTTCCGATCT <u>TAGG</u> CCGTCCTCAACCAAC-3'  |
| All 4-Control forward <sup>a</sup>                | 5' -ACACTCTTTCCCTACACGACGCTCTTCCGATCT <u>GTA</u> ACCGTCCAAACCAAC-3'   |
| All 4-Damaged forward <sup>a</sup>                | 5' -ACACTCTTTCCCTACACGACGCTCTTCCGATCT <u>TACAT</u> CCGTCCTCAACCAAC-3' |
| hRev1-hPol $\kappa$ -Control forward <sup>a</sup> | 5' -ACACTCTTTCCCTACACGACGCTCTTCCGATCT <u>ATC</u> ACCGTCCAAACCAAC-3'   |
| hRev1-hPol $\kappa$ -Damaged forward <sup>a</sup> | 5' -ACACTCTTTCCCTACACGACGCTCTTCCGATCT <u>TGCG</u> CCGTCCTCAACCAAC-3'  |
| HT-SOSA reverse                                   | 5' -CAAGCAGAAGACGGCATAACGAGCTCTTCCGATCTGGACGGCATTGGATC-3'             |
| Illumina PCR 1 <sup>b</sup>                       | 5' -AATGATACGGCGACCACCGAGATCTACACTCTTTCCCTACACGACGCTCTTCCGATCT-3'     |
| Illumina PCR 2 <sup>b</sup>                       | 5' -CAAGCAGAAGACGGCATAACGAGCTCTTCCGATCT-3'                            |
| Illumina sequencing <sup>b</sup>                  | 5' -ACACTCTTTCCCTACACGACGCTCTTCCGATCT-3'                              |

<sup>a</sup>Underlined nucleotides represent the unique barcode sequences that were used to identify each lesion bypass product origin.

<sup>b</sup>Oligonucleotide sequences © 2007-2013 Illumina, Inc. All rights reserved.

**Table S2.** Number of sequences analyzed by HT-SOSA

| Enzyme(s)             | DNA substrate       | Barcode | Sequences Analyzed | % of total |
|-----------------------|---------------------|---------|--------------------|------------|
| hPol $\eta$           | 13-mer/40-mer-ctl   | GGAT    | 2,275,445          | 6.8        |
| hPol $\eta$           | 13-mer/40-mer-8oxoG | TTCG    | 2,574,720          | 7.7        |
| hPol $\kappa$         | 13-mer/40-mer-ctl   | CCTA    | 3,525,689          | 10.6       |
| hPol $\kappa$         | 13-mer/40-mer-8oxoG | CGTT    | 3,135,229          | 9.4        |
| hPol $\iota$          | 13-mer/40-mer-ctl   | AACT    | 4,710,203          | 14.1       |
| hPol $\iota$          | 13-mer/40-mer-8oxoG | TAGG    | 3,383,766          | 10.2       |
| All 4 Pols            | 13-mer/40-mer-ctl   | GTAA    | 3,277,891          | 9.9        |
| All 4 Pols            | 13-mer/40-mer-8oxoG | ACAT    | 3,241,632          | 9.7        |
| hRev1 + hPol $\kappa$ | 16-mer/40-mer-ctl   | ATCA    | 3,840,351          | 11.5       |
| hRev1 + hPol $\kappa$ | 16-mer/40-mer-8oxoG | TGCG    | 3,292,062          | 9.9        |

**Table S3.** Error rates of human Y-family DNA polymerases calculated by HT-SOSA analysis.

| Enzyme          | DNA substrate           | Event                        | Substitution Error Rate <sup>a</sup> | Substitution Error Ratio <sup>b</sup> | Insertion Error Rate <sup>a</sup> | Insertion Error Ratio <sup>b</sup> | Deletion Error Rate <sup>a</sup> | Deletion Error Ratio <sup>b</sup> |
|-----------------|-------------------------|------------------------------|--------------------------------------|---------------------------------------|-----------------------------------|------------------------------------|----------------------------------|-----------------------------------|
| hPolη           | 13-mer/<br>40-mer-ctl   | Opposite dG <sup>c</sup>     | $2.5 \times 10^{-2}$                 |                                       | $7.4 \times 10^{-4}$              |                                    | $4.6 \times 10^{-3}$             |                                   |
|                 |                         | Upstream <sup>d</sup>        | $1.5 \times 10^{-2}$                 |                                       | $6.6 \times 10^{-4}$              |                                    | $3.7 \times 10^{-3}$             |                                   |
|                 |                         | Downstream <sup>e</sup>      | $1.8 \times 10^{-2}$                 |                                       | $4.9 \times 10^{-4}$              |                                    | $3.0 \times 10^{-3}$             |                                   |
|                 |                         | Total <sup>f</sup>           | $1.8 \times 10^{-2}$                 |                                       | $6.0 \times 10^{-4}$              |                                    | $3.6 \times 10^{-3}$             |                                   |
| hPolη           | 13-mer/<br>40-mer-8oxoG | Opposite 8-oxoG <sup>c</sup> | $4.4 \times 10^{-1}$                 | 17.6                                  | $7.1 \times 10^{-4}$              | 1.0                                | $1.3 \times 10^{-2}$             | 2.8                               |
|                 |                         | Upstream <sup>d</sup>        | $1.7 \times 10^{-2}$                 | 1.1                                   | $1.0 \times 10^{-3}$              | 1.5                                | $3.4 \times 10^{-3}$             | 0.9                               |
|                 |                         | Downstream <sup>e</sup>      | $2.0 \times 10^{-2}$                 | 1.1                                   | $6.3 \times 10^{-4}$              | 1.3                                | $4.8 \times 10^{-3}$             | 1.6                               |
|                 |                         | Total <sup>f</sup>           | $7.9 \times 10^{-2}$                 | 4.4                                   | $8.2 \times 10^{-4}$              | 1.4                                | $5.3 \times 10^{-3}$             | 1.5                               |
| hPolκ           | 13-mer/<br>40-mer-ctl   | Opposite dG <sup>c</sup>     | $4.8 \times 10^{-2}$                 |                                       | $4.0 \times 10^{-4}$              |                                    | $9.3 \times 10^{-3}$             |                                   |
|                 |                         | Upstream <sup>d</sup>        | $8.1 \times 10^{-3}$                 |                                       | $4.5 \times 10^{-4}$              |                                    | $6.8 \times 10^{-3}$             |                                   |
|                 |                         | Downstream <sup>e</sup>      | $1.1 \times 10^{-2}$                 |                                       | $4.2 \times 10^{-4}$              |                                    | $8.1 \times 10^{-3}$             |                                   |
|                 |                         | Total <sup>f</sup>           | $1.5 \times 10^{-2}$                 |                                       | $4.3 \times 10^{-4}$              |                                    | $7.7 \times 10^{-3}$             |                                   |
| hPolκ           | 13-mer/<br>40-mer-8oxoG | Opposite 8-oxoG <sup>c</sup> | $8.0 \times 10^{-1}$                 | 16.7                                  | $1.2 \times 10^{-4}$              | 0.3                                | $1.8 \times 10^{-2}$             | 1.9                               |
|                 |                         | Upstream <sup>d</sup>        | $1.4 \times 10^{-2}$                 | 1.7                                   | $1.6 \times 10^{-3}$              | 3.6                                | $5.0 \times 10^{-3}$             | 0.7                               |
|                 |                         | Downstream <sup>e</sup>      | $1.7 \times 10^{-2}$                 | 1.5                                   | $4.0 \times 10^{-4}$              | 1.0                                | $1.4 \times 10^{-2}$             | 1.7                               |
|                 |                         | Total <sup>f</sup>           | $1.3 \times 10^{-1}$                 | 8.7                                   | $8.8 \times 10^{-4}$              | 2.0                                | $1.1 \times 10^{-2}$             | 1.4                               |
| hPolι           | 13-mer/<br>40-mer-ctl   | Opposite dG <sup>c</sup>     | $3.1 \times 10^{-2}$                 |                                       | $1.8 \times 10^{-4}$              |                                    | $7.0 \times 10^{-2}$             |                                   |
|                 |                         | Upstream <sup>d</sup>        | $2.7 \times 10^{-1}$                 |                                       | $1.1 \times 10^{-3}$              |                                    | $2.4 \times 10^{-2}$             |                                   |
|                 |                         | Downstream <sup>e</sup>      | $6.4 \times 10^{-2}$                 |                                       | $6.5 \times 10^{-4}$              |                                    | $1.1 \times 10^{-2}$             |                                   |
|                 |                         | Total <sup>f</sup>           | $1.5 \times 10^{-1}$                 |                                       | $7.9 \times 10^{-4}$              |                                    | $2.5 \times 10^{-2}$             |                                   |
| hPolι           | 13-mer/<br>40-mer-8oxoG | Opposite 8-oxoG <sup>c</sup> | $2.7 \times 10^{-1}$                 | 8.7                                   | $2.9 \times 10^{-4}$              | 1.6                                | $7.3 \times 10^{-2}$             | 1.0                               |
|                 |                         | Upstream <sup>d</sup>        | $2.9 \times 10^{-1}$                 | 1.1                                   | $3.0 \times 10^{-3}$              | 2.7                                | $2.3 \times 10^{-2}$             | 1.0                               |
|                 |                         | Downstream <sup>e</sup>      | $2.7 \times 10^{-2}$                 | 0.4                                   | $1.7 \times 10^{-3}$              | 2.6                                | $3.3 \times 10^{-2}$             | 3.0                               |
|                 |                         | Total <sup>f</sup>           | $1.7 \times 10^{-1}$                 | 1.1                                   | $2.0 \times 10^{-3}$              | 2.5                                | $3.4 \times 10^{-2}$             | 1.4                               |
| All 4 Pols      | 13-mer/<br>40-mer-ctl   | Opposite dG <sup>c</sup>     | $3.4 \times 10^{-2}$                 |                                       | $5.1 \times 10^{-4}$              |                                    | $6.6 \times 10^{-3}$             |                                   |
|                 |                         | Upstream <sup>d</sup>        | $1.4 \times 10^{-2}$                 |                                       | $4.9 \times 10^{-4}$              |                                    | $6.6 \times 10^{-3}$             |                                   |
|                 |                         | Downstream <sup>e</sup>      | $1.2 \times 10^{-2}$                 |                                       | $4.1 \times 10^{-4}$              |                                    | $6.2 \times 10^{-3}$             |                                   |
|                 |                         | Total <sup>f</sup>           | $1.6 \times 10^{-2}$                 |                                       | $4.6 \times 10^{-4}$              |                                    | $6.4 \times 10^{-3}$             |                                   |
| All 4 Pols      | 13-mer/<br>40-mer-8oxoG | Opposite 8-oxoG <sup>c</sup> | $5.5 \times 10^{-1}$                 | 16.2                                  | $6.1 \times 10^{-3}$              | 12.0                               | $4.3 \times 10^{-2}$             | 6.5                               |
|                 |                         | Upstream <sup>d</sup>        | $3.4 \times 10^{-2}$                 | 2.4                                   | $7.3 \times 10^{-4}$              | 1.5                                | $1.6 \times 10^{-2}$             | 2.4                               |
|                 |                         | Downstream <sup>e</sup>      | $1.7 \times 10^{-2}$                 | 1.4                                   | $3.3 \times 10^{-4}$              | 0.8                                | $1.8 \times 10^{-2}$             | 2.9                               |
|                 |                         | Total <sup>f</sup>           | $1.0 \times 10^{-1}$                 | 6.3                                   | $1.3 \times 10^{-3}$              | 2.8                                | $2.1 \times 10^{-2}$             | 3.3                               |
| hRev1+<br>hPolκ | 13-mer/<br>40-mer-ctl   | Opposite dG <sup>c</sup>     | $1.0 \times 10^{-2}$                 |                                       | $1.2 \times 10^{-2}$              |                                    | $2.9 \times 10^{-3}$             |                                   |
|                 |                         | Downstream <sup>e</sup>      | $2.7 \times 10^{-2}$                 |                                       | $8.0 \times 10^{-4}$              |                                    | $4.1 \times 10^{-2}$             |                                   |
|                 |                         | Total <sup>f</sup>           | $2.3 \times 10^{-2}$                 |                                       | $3.7 \times 10^{-3}$              |                                    | $3.2 \times 10^{-2}$             |                                   |
| hRev1+<br>hPolκ | 13-mer/<br>40-mer-8oxoG | Opposite 8-oxoG <sup>c</sup> | $7.0 \times 10^{-2}$                 | 7.0                                   | $1.9 \times 10^{-4}$              | 0.02                               | $7.1 \times 10^{-3}$             | 2.4                               |
|                 |                         | Downstream <sup>e</sup>      | $1.3 \times 10^{-2}$                 | 0.5                                   | $8.2 \times 10^{-4}$              | 1.0                                | $1.3 \times 10^{-2}$             | 0.3                               |
|                 |                         | Total <sup>f</sup>           | $2.7 \times 10^{-2}$                 | 1.2                                   | $6.7 \times 10^{-4}$              | 0.2                                | $1.2 \times 10^{-2}$             | 0.4                               |

<sup>a</sup>Calculated using  $\Sigma(\text{specific mutation type})/[(\text{number of sequences}) \times (\text{number of bases in event})]$ .

<sup>b</sup>Calculated using  $[\Sigma(\text{specific mutation type})/[(\text{number of sequences}) \times (\text{number of bases in event})]]_{40\text{-mer-8oxoG}}/[\Sigma(\text{specific mutation type})/[(\text{number of sequences}) \times (\text{number of bases in event})]]_{40\text{-mer-ctl}}$ .

<sup>c</sup>Opposite dG and opposite 8-oxoG events include all events at position 0 in Fig. 2.

<sup>d</sup>Upstream events include all events that occurred at positions -3 to -1, before an enzyme encountered the lesion.

<sup>e</sup>Downstream events include all events that occurred at positions +1 to +3, after an enzyme encountered the lesion.

<sup>f</sup>Total events include all events from position -3 to +3 in Fig. 2.

**Table S4.** Relative number of nucleotide incorporations, deletions and insertions generated by hPol $\eta$  as a function of template position with the control template

|           | Template Base and Position |       |       |       |       |       |       |
|-----------|----------------------------|-------|-------|-------|-------|-------|-------|
|           | A                          | G     | T     | G     | C     | A     | G     |
|           | -3                         | -2    | -1    | 0     | 1     | 2     | 3     |
| dA        | 0.84                       | 0.27  | 98.19 | 0.57  | 0.64  | 0.89  | 0.37  |
| dT        | 97.60                      | 0.71  | 0.23  | 1.20  | 0.26  | 96.09 | 0.32  |
| dC        | 0.50                       | 98.25 | 0.34  | 97.01 | 0.07  | 2.29  | 98.69 |
| dG        | 0.46                       | 0.32  | 0.97  | 0.68  | 98.82 | 0.32  | 0.17  |
| Deletion  | 0.53                       | 0.37  | 0.22  | 0.46  | 0.18  | 0.34  | 0.38  |
| Insertion | 0.07                       | 0.07  | 0.05  | 0.07  | 0.03  | 0.06  | 0.06  |

**Table S5.** Relative number of nucleotide incorporations, deletions and insertions generated by hPol $\eta$  as a function of template position with the damaged template

|           | Template Base and Position |       |       |       |       |       |       |
|-----------|----------------------------|-------|-------|-------|-------|-------|-------|
|           | A                          | G     | T     | Y     | C     | A     | G     |
|           | -3                         | -2    | -1    | 0     | 1     | 2     | 3     |
| dA        | 1.01                       | 0.56  | 98.31 | 41.70 | 1.02  | 0.81  | 0.59  |
| dT        | 97.48                      | 0.70  | 0.31  | 1.32  | 0.16  | 96.11 | 0.64  |
| dC        | 0.55                       | 97.81 | 0.37  | 54.47 | 0.08  | 2.07  | 97.87 |
| dG        | 0.52                       | 0.41  | 0.64  | 1.19  | 98.36 | 0.41  | 0.23  |
| Deletion  | 0.36                       | 0.42  | 0.22  | 1.25  | 0.32  | 0.57  | 0.56  |
| Insertion | 0.08                       | 0.10  | 0.13  | 0.07  | 0.05  | 0.04  | 0.10  |

**Table S6.** Relative number of nucleotide incorporations, deletions and insertions generated by hPolk as a function of template position with the control template

|           | Template Base and Position |       |       |       |       |       |       |
|-----------|----------------------------|-------|-------|-------|-------|-------|-------|
|           | A                          | G     | T     | G     | C     | A     | G     |
|           | -3                         | -2    | -1    | 0     | 1     | 2     | 3     |
| dA        | 0.23                       | 0.17  | 98.97 | 1.31  | 0.34  | 0.20  | 0.37  |
| dT        | 98.53                      | 0.83  | 0.16  | 1.05  | 0.12  | 98.87 | 1.64  |
| dC        | 0.05                       | 97.90 | 0.09  | 94.19 | 0.01  | 0.21  | 96.22 |
| dG        | 0.12                       | 0.38  | 0.38  | 2.48  | 99.10 | 0.06  | 0.32  |
| Deletion  | 1.03                       | 0.67  | 0.35  | 0.93  | 0.41  | 0.61  | 1.40  |
| Insertion | 0.04                       | 0.04  | 0.05  | 0.04  | 0.02  | 0.05  | 0.05  |

**Table S7.** Relative number of nucleotide incorporations, deletions and insertions generated by hPolk as a function of template position with the damaged template

|           | Template Base and Position |       |       |       |       |       |       |
|-----------|----------------------------|-------|-------|-------|-------|-------|-------|
|           | A                          | G     | T     | Y     | C     | A     | G     |
|           | -3                         | -2    | -1    | 0     | 1     | 2     | 3     |
| dA        | 0.67                       | 0.63  | 98.57 | 78.01 | 1.66  | 0.37  | 0.35  |
| dT        | 97.85                      | 1.17  | 0.30  | 1.42  | 0.17  | 97.19 | 1.55  |
| dC        | 0.28                       | 97.25 | 0.20  | 18.51 | 0.04  | 0.44  | 96.25 |
| dG        | 0.32                       | 0.48  | 0.30  | 0.22  | 97.09 | 0.33  | 0.21  |
| Deletion  | 0.83                       | 0.42  | 0.25  | 1.82  | 1.03  | 1.63  | 1.58  |
| Insertion | 0.05                       | 0.06  | 0.38  | 0.01  | 0.02  | 0.04  | 0.06  |

**Table S8.** Relative number of nucleotide incorporations, deletions and insertions generated by hPolI as a function of template position with the control template

|           | Template Base and Position |       |       |       |       |       |       |
|-----------|----------------------------|-------|-------|-------|-------|-------|-------|
|           | A                          | G     | T     | G     | C     | A     | G     |
|           | -3                         | -2    | -1    | 0     | 1     | 2     | 3     |
| dA        | 0.04                       | 0.26  | 29.47 | 0.99  | 0.78  | 0.09  | 0.55  |
| dT        | 99.45                      | 17.68 | 18.65 | 2.02  | 10.28 | 98.95 | 6.32  |
| dC        | 0.02                       | 81.68 | 0.63  | 89.86 | 0.98  | 0.14  | 92.27 |
| dG        | 0.05                       | 0.13  | 44.41 | 0.09  | 85.93 | 0.02  | 0.08  |
| Deletion  | 0.34                       | 0.19  | 6.65  | 7.03  | 1.99  | 0.69  | 0.72  |
| Insertion | 0.10                       | 0.05  | 0.19  | 0.02  | 0.04  | 0.11  | 0.05  |

**Table S9.** Relative number of nucleotide incorporations, deletions and insertions generated by hPolI as a function of template position with the damaged template

|           | Template Base and Position |       |       |       |       |       |       |
|-----------|----------------------------|-------|-------|-------|-------|-------|-------|
|           | A                          | G     | T     | Y     | C     | A     | G     |
|           | -3                         | -2    | -1    | 0     | 1     | 2     | 3     |
| dA        | 0.11                       | 0.53  | 26.78 | 21.74 | 1.23  | 0.73  | 0.63  |
| dT        | 99.09                      | 17.71 | 28.72 | 4.81  | 0.73  | 95.43 | 3.30  |
| dC        | 0.09                       | 80.92 | 0.66  | 65.75 | 0.28  | 0.78  | 92.24 |
| dG        | 0.20                       | 0.22  | 37.32 | 0.40  | 93.98 | 0.18  | 0.12  |
| Deletion  | 0.32                       | 0.54  | 5.91  | 7.26  | 3.72  | 2.71  | 3.45  |
| Insertion | 0.19                       | 0.09  | 0.61  | 0.03  | 0.07  | 0.17  | 0.26  |

**Table S10.** Relative number of nucleotide incorporations, deletions and insertions generated by the combination of hRev1 and hPolk as a function of template position with the control template

|           | Template Base and Position |       |       |       |
|-----------|----------------------------|-------|-------|-------|
|           | G                          | C     | A     | G     |
|           | 0                          | 1     | 2     | 3     |
| dA        | 0.07                       | 0.20  | 0.22  | 0.19  |
| dT        | 0.52                       | 0.16  | 91.90 | 1.18  |
| dC        | 97.46                      | 4.22  | 1.25  | 97.66 |
| dG        | 0.44                       | 89.69 | 0.65  | 0.06  |
| Deletion  | 0.29                       | 5.66  | 5.92  | 0.80  |
| Insertion | 1.22                       | 0.07  | 0.06  | 0.11  |

**Table S11.** Relative number of nucleotide incorporations, deletions and insertions generated by the combination of hRev1 and hPolk as a function of template position with the damaged template

|           | Template Base and Position |       |       |       |
|-----------|----------------------------|-------|-------|-------|
|           | Y                          | C     | A     | G     |
|           | 0                          | 1     | 2     | 3     |
| dA        | 6.59                       | 0.67  | 0.26  | 0.24  |
| dT        | 0.33                       | 0.10  | 96.78 | 1.29  |
| dC        | 92.32                      | 0.06  | 0.98  | 96.93 |
| dG        | 0.04                       | 98.28 | 0.10  | 0.13  |
| Deletion  | 0.71                       | 0.73  | 1.86  | 1.36  |
| Insertion | 0.02                       | 0.16  | 0.03  | 0.06  |

**Table S12.** Relative number of nucleotide incorporations, deletions and insertions generated by the combination of all four Y-family polymerases as a function of template position with the control template

|           | Template Base and Position |       |       |       |       |       |       |
|-----------|----------------------------|-------|-------|-------|-------|-------|-------|
|           | A                          | G     | T     | G     | C     | A     | G     |
|           | -3                         | -2    | -1    | 0     | 1     | 2     | 3     |
| dA        | 0.21                       | 0.14  | 97.44 | 0.94  | 0.33  | 0.26  | 0.26  |
| dT        | 97.77                      | 0.58  | 0.21  | 0.85  | 0.12  | 98.22 | 1.27  |
| dC        | 1.07                       | 98.63 | 0.99  | 95.91 | 0.25  | 0.81  | 97.32 |
| dG        | 0.09                       | 0.21  | 0.54  | 1.59  | 98.99 | 0.09  | 0.08  |
| Deletion  | 0.81                       | 0.38  | 0.77  | 0.66  | 0.30  | 0.56  | 1.00  |
| Insertion | 0.04                       | 0.06  | 0.05  | 0.05  | 0.02  | 0.04  | 0.06  |

**Table S13.** Relative number of nucleotide incorporations, deletions and insertions generated by the combination of all four Y-family polymerases as a function of template position with the damaged template

|           | Template Base and Position |       |       |       |       |       |       |
|-----------|----------------------------|-------|-------|-------|-------|-------|-------|
|           | A                          | G     | T     | Y     | C     | A     | G     |
|           | -3                         | -2    | -1    | 0     | 1     | 2     | 3     |
| dA        | 0.52                       | 0.27  | 97.61 | 73.09 | 1.19  | 0.41  | 0.34  |
| dT        | 95.84                      | 0.84  | 0.34  | 0.99  | 0.11  | 96.98 | 1.45  |
| dC        | 2.30                       | 97.64 | 0.50  | 23.35 | 0.06  | 0.97  | 96.51 |
| dG        | 0.32                       | 0.46  | 0.88  | 0.44  | 98.27 | 0.33  | 0.15  |
| Deletion  | 0.98                       | 0.73  | 0.50  | 2.12  | 0.35  | 1.28  | 1.50  |
| Insertion | 0.04                       | 0.07  | 0.18  | 0.02  | 0.02  | 0.03  | 0.05  |



**A**

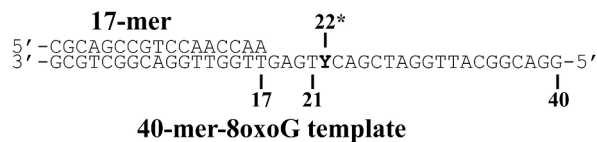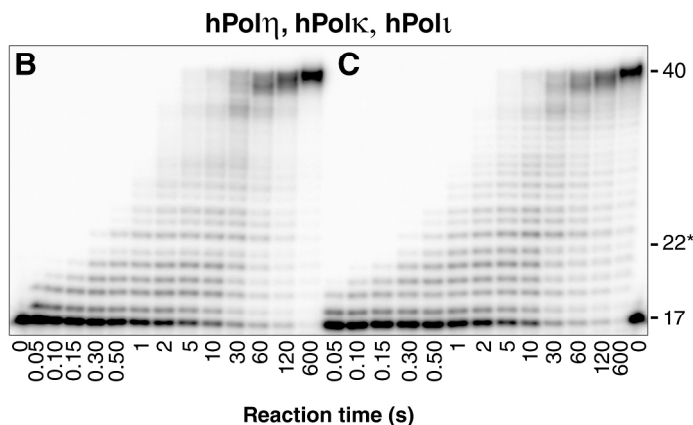

**Figure S1.** Time-dependent lesion bypass catalyzed by the combination of hPol $\eta$ , hPol $\kappa$  and hPol $\iota$ . **(A)** The damaged 17-mer/40-mer-8oxoG substrate. The position of the 8-oxoG lesion within the template strand is indicated by a “Y”. A pre-incubated solution containing 25 nM of hPol $\eta$ , 25 nM of hPol $\kappa$  and 25 nM of hPol $\iota$  was first mixed with a solution of 100 nM of 5'-<sup>[32]P</sup>-labeled **(B)** 17-mer/40-mer or **(C)** 17-mer/40-mer-8oxoG. The enzyme and DNA substrate solution was briefly incubated at 37°C and then rapidly mixed with a solution of all 4 dNTPs (200  $\mu$ M each). The reaction mixtures were quenched at the indicated times with 0.37 M EDTA and resolved by using denaturing PAGE. The sizes of important products are indicated, and the 22nd position is denoted with an asterisk (\*) to indicate an incorporation opposite the 8-oxoG lesion site.

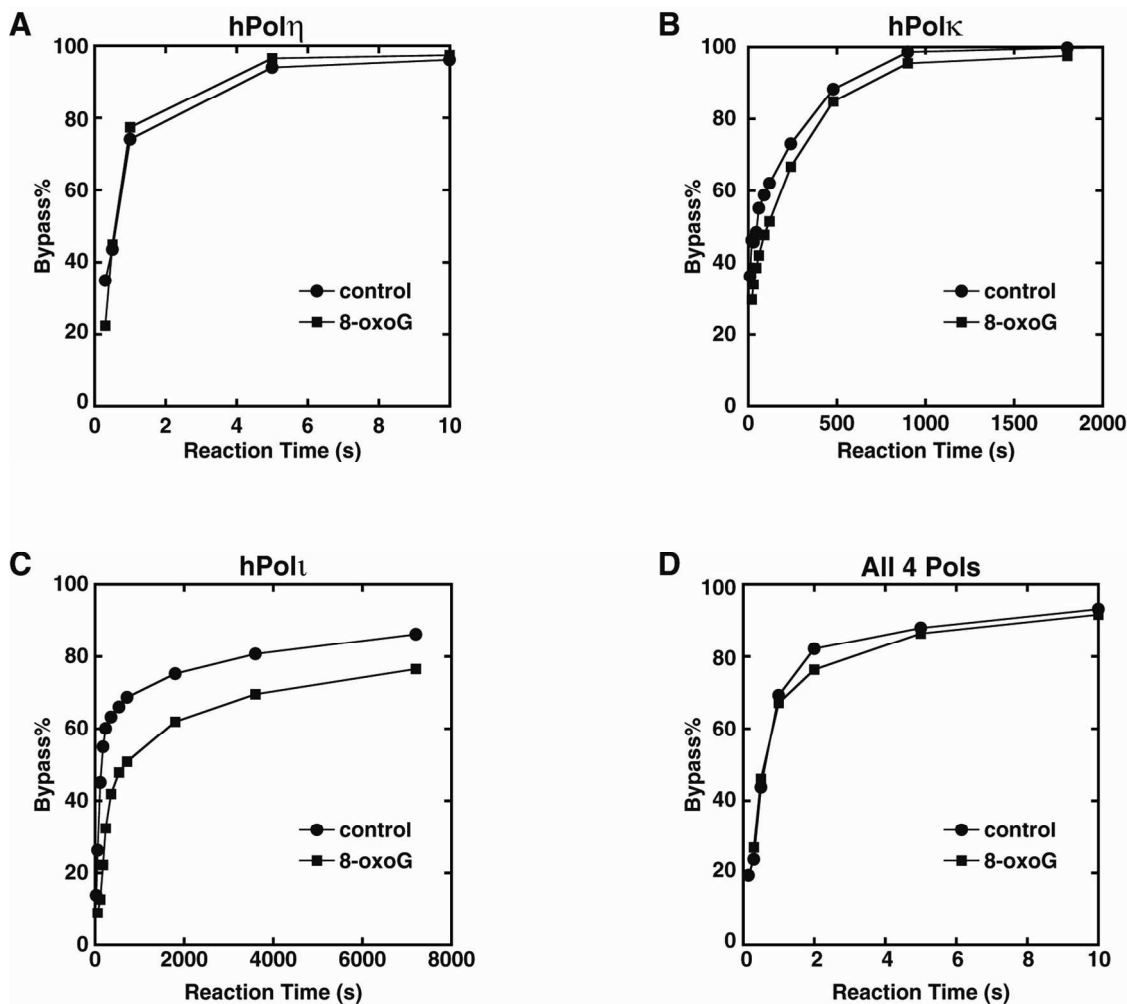

**Figure S2.** Time-dependent lesion bypass during running start assays. The control 17-mer/40-mer or damaged 17-mer/40-mer-8-oxoG substrates (100 nM) were extended by an individual Y-family polymerase (100 nM) or all 4 Y-family DNA polymerases (25 nM each). The control dG or damaged 8-oxoG bypass% was plotted as a function of reaction time for (A) hPol $\eta$ , (B) hPol $\kappa$ , (C) hPol $\iota$  or (D) the combination of all 4 human Y-family polymerases.

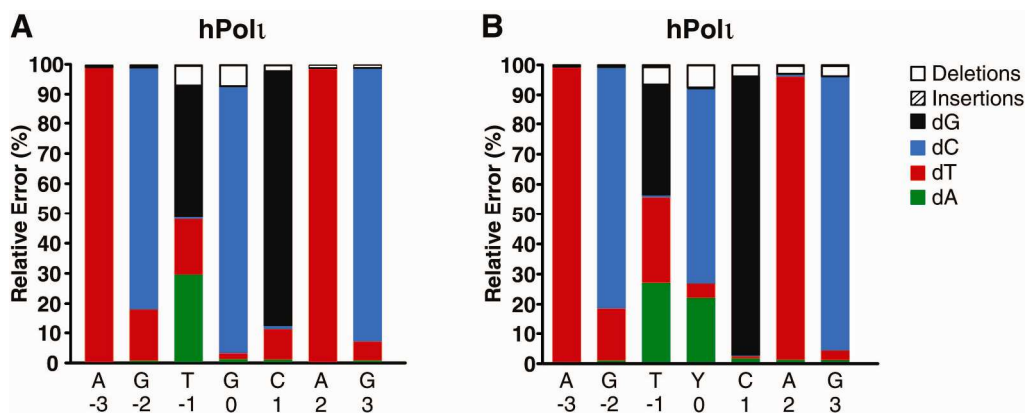

**Figure S3.** Histogram of nucleotide incorporations, insertions and deletions generated by hPolI as a function of template position. Lesion bypass analysis for hPolI by using either **(A)** the undamaged 17-mer/40-mer substrate or **(B)** the damaged 17-mer/40-mer-8oxodG substrate are shown. The relative number of base deletions (white bar), base insertions (striped bar), or dG (black bar), dC (blue bar), dT (red bar) or dA (green bar) incorporations as a percentage of the total dNTP incorporations are indicated at each template position. The template bases are denoted and the 8-oxodG lesion is represented as “Y”. The indicated template positions are relative to the 8-oxodG lesion site within the 40-mer-8oxodG template.
